# Supplementary material for: Manual therapy for unsettled, distressed and excessively crying infants: a systematic review and meta-analyses
Source: PubMed Central journal article supplement — BMJ Open. 2018 Jan 24;8(1):e019040. doi: 10.1136/bmjopen-2017-019040 (PMC5988120; doi:10.1136/bmjopen-2017-019040), 2018-01-24
Supplement: bmjopen-2017-019040supp001.pdf [file bmjopen-2017-019040supp001.pdf]

## Supplementary Appendix

### Search strategy MEDLINE (Ovid). Searched on 20/3

|    |                                                                                                                                                                                                                                                                                                                                                                                                                                                                                                                                                                                                                                                    |             |
|----|----------------------------------------------------------------------------------------------------------------------------------------------------------------------------------------------------------------------------------------------------------------------------------------------------------------------------------------------------------------------------------------------------------------------------------------------------------------------------------------------------------------------------------------------------------------------------------------------------------------------------------------------------|-------------|
| 1  | Musculoskeletal Manipulations/                                                                                                                                                                                                                                                                                                                                                                                                                                                                                                                                                                                                                     | 1113        |
| 2  | Chiropractic/ or Manipulation, Chiropractic/                                                                                                                                                                                                                                                                                                                                                                                                                                                                                                                                                                                                       | 3748        |
| 3  | Osteopathic Medicine/ or Manipulation, Osteopathic/                                                                                                                                                                                                                                                                                                                                                                                                                                                                                                                                                                                                | 3458        |
| 4  | Physical Therapy Modalities/ or Physical Therapy Specialty/                                                                                                                                                                                                                                                                                                                                                                                                                                                                                                                                                                                        | 33016       |
| 5  | osteopath*.tw.                                                                                                                                                                                                                                                                                                                                                                                                                                                                                                                                                                                                                                     | 4428        |
| 6  | osteopathic medicine.tw.                                                                                                                                                                                                                                                                                                                                                                                                                                                                                                                                                                                                                           | 447         |
| 7  | manual therap*.tw.                                                                                                                                                                                                                                                                                                                                                                                                                                                                                                                                                                                                                                 | 1513        |
| 8  | manual medic*.tw.                                                                                                                                                                                                                                                                                                                                                                                                                                                                                                                                                                                                                                  | 194         |
| 9  | chiropract*.tw.                                                                                                                                                                                                                                                                                                                                                                                                                                                                                                                                                                                                                                    | 4817        |
| 10 | physiotherap*.tw.                                                                                                                                                                                                                                                                                                                                                                                                                                                                                                                                                                                                                                  | 17644       |
| 11 | physical therap*.tw.                                                                                                                                                                                                                                                                                                                                                                                                                                                                                                                                                                                                                               | 15693       |
| 12 | manipulat* therap*.tw.                                                                                                                                                                                                                                                                                                                                                                                                                                                                                                                                                                                                                             | 864         |
| 13 | OMT*.tw.                                                                                                                                                                                                                                                                                                                                                                                                                                                                                                                                                                                                                                           | 1048        |
| 14 | Pediatrics/                                                                                                                                                                                                                                                                                                                                                                                                                                                                                                                                                                                                                                        | 45050       |
| 15 | Child, Preschool/ or Infant/ or Infant, Newborn/                                                                                                                                                                                                                                                                                                                                                                                                                                                                                                                                                                                                   | 1367091     |
| 16 | Infant, Premature/                                                                                                                                                                                                                                                                                                                                                                                                                                                                                                                                                                                                                                 | 44779       |
| 17 | (pediatric* or paediatric*).tw.                                                                                                                                                                                                                                                                                                                                                                                                                                                                                                                                                                                                                    | 247751      |
| 18 | (baby* or babies or infant* or infancy).tw.                                                                                                                                                                                                                                                                                                                                                                                                                                                                                                                                                                                                        | 397831      |
| 19 | (newborn or neonat* or preterm* or premature*).tw.                                                                                                                                                                                                                                                                                                                                                                                                                                                                                                                                                                                                 | 406003      |
| 20 | pre-school*.tw.                                                                                                                                                                                                                                                                                                                                                                                                                                                                                                                                                                                                                                    | 3997        |
| 21 | (toddler* or nursery school* or kindergar*).tw.                                                                                                                                                                                                                                                                                                                                                                                                                                                                                                                                                                                                    | 12720       |
| 22 | preschool*.tw.                                                                                                                                                                                                                                                                                                                                                                                                                                                                                                                                                                                                                                     | 20817       |
| 23 | 1 or 2 or 3 or 4 or 5 or 6 or 7 or 8 or 9 or 10 or 11 or 12 or 13                                                                                                                                                                                                                                                                                                                                                                                                                                                                                                                                                                                  | 66104       |
| 24 | 14 or 15 or 16 or 17 or 18 or 19 or 20 or 21 or 22                                                                                                                                                                                                                                                                                                                                                                                                                                                                                                                                                                                                 | 1797322     |
| 25 | 23 and 24                                                                                                                                                                                                                                                                                                                                                                                                                                                                                                                                                                                                                                          | 5198        |
| 26 | limit 25 to (humans and ("all infant (birth to 23 months)" or "preschool child (2 to 5 years)") and humans and (case reports or clinical study or clinical trial, all or clinical trial, phase i or clinical trial, phase ii or clinical trial, phase iii or clinical trial, phase iv or clinical trial or comparative study or controlled clinical trial or evaluation studies or government publications or guideline or journal article or meta analysis or multicenter study or observational study or practice guideline or pragmatic clinical trial or randomized controlled trial or "review" or systematic reviews or validation studies)) | <b>3788</b> |
|    | Nb: adding "." to a two word phrase does not reduce the hits.                                                                                                                                                                                                                                                                                                                                                                                                                                                                                                                                                                                      |             |



Search strategy WOS searched 28/3

|     |                                                                                                                                                                       |             |
|-----|-----------------------------------------------------------------------------------------------------------------------------------------------------------------------|-------------|
| # 1 | TS="manipulative therap*"                                                                                                                                             | 670         |
| #2  | TS="manual therap*"                                                                                                                                                   | 1518        |
| #3  | TS="manual medic*"                                                                                                                                                    | 158         |
| #4  | TS= (osteopath*)                                                                                                                                                      | 2539        |
| #5  | TS="osteopathic medicine*"                                                                                                                                            | 274         |
| #6  | TS="musculoskeletal manipulat*"                                                                                                                                       | 117         |
| #7  | TS= (chiropract*)                                                                                                                                                     | 3763        |
| #8  | TS= (physiotherap*)                                                                                                                                                   | 15,228      |
| #9  | TS= ("physical therap*")                                                                                                                                              | 14,452      |
| #10 | TS=OMT                                                                                                                                                                | 1006        |
| #11 | TS=(pediatric* OR paediatric*)                                                                                                                                        | 258,801     |
| #12 | TS=(baby* or babies or infant* or infancy)                                                                                                                            | 389,506     |
| #13 | TS=(newborn* or neonat* or preterm* or premature*)                                                                                                                    | 404,386     |
| #14 | TS=pre-school*                                                                                                                                                        | 3780        |
| #15 | TS=preschool*                                                                                                                                                         | 39,891      |
| #16 | TS=(toddler* OR "nursery school*" OR kindergar*)                                                                                                                      | 20,504      |
| #17 | TS=child*                                                                                                                                                             | 1,260,094   |
| #18 | #10 OR #9 OR #8 OR #7 OR #6 OR #5 OR #4 OR #3 OR #2 OR #1                                                                                                             | 35,258      |
| #19 | #17 OR #16 OR #15 OR #14 OR #13 OR #12 OR #11                                                                                                                         | 1,867,978   |
| #20 | #18 AND #19 Indexes=SCI-EXPANDED, SSCI, ESCI Timespan=All years                                                                                                       | 3890        |
| #21 | (#20) AND DOCUMENT TYPES: (Article OR Abstract of Published Item OR Discussion OR Proceedings Paper OR Review)<br>Indexes=SCI-EXPANDED, SSCI, ESCI Timespan=All years | <b>3603</b> |
|     |                                                                                                                                                                       |             |
|     |                                                                                                                                                                       |             |
|     |                                                                                                                                                                       |             |
